Practice Advisory for the Perioperative Management of Patients with Cardiac Implantable Electronic Devices: Pacemakers and Implantable Cardioverter–Defibrillators 2020: An Updated Report by the American Society of Anesthesiologists Task Force on Perioperative Management of Patients with Cardiac Implantable Electronic Devices: Erratum

In the February 2020 issue, the article “Practice Advisory for the Perioperative Management of Patients with Cardiac Implantable Electronic Devices: Pacemakers and Implantable Cardioverter–Defibrillators 2020: An Updated Report by the American Society of Anesthesiologists Task Force on Perioperative Management of Patients with Cardiac Implantable Electronic Devices” (ANESTHESIOLOGY 2020; 132:225–52. doi: 10.1097/ALN.0000000000002821) contains the wrong short title. The correct short title is “Cardiac Implantable Electronic Device Management.”

The online version and PDF of the article have been corrected.

DOI: 10.1097/ALN.0000000000003217

### Reference

Practice Advisory for the Perioperative Management of Patients with Cardiac Implantable Electronic Devices: Pacemakers and Implantable Cardioverter–Defibrillators 2020: An Updated Report by the American Society of Anesthesiologists Task Force on Perioperative Management of Patients with Cardiac Implantable Electronic Devices. ANESTHESIOLOGY 2020; 132:225–52. doi: 10.1097/ALN.0000000000002821.
